# Supplementary material for: Photoinduced energy and electron transfer processes in a supramolecular system combining a tetrapyrenylporphyrin derivative and arene–ruthenium metalla-prisms
Source: Royal Society of Chemistry journal article supplement (doi:10.1039/d4dt03154g), 2025-01-01
Supplement: d4dt03154g1.pdf [file d4dt03154g1.pdf]

## Electronic Supplementary Information

for

### Photoinduced energy and electron transfer processes in a supramolecular system combining a tetrapyrenylporphyrin derivative and arene-ruthenium metalla-prisms

Santiago Luis Pons Alles,<sup>a</sup> Daniele Veclani,<sup>b</sup> Andrea Barbieri,<sup>b</sup>

Bruno Therrien<sup>\*a</sup> and Barbara Ventura<sup>\*b</sup>

<sup>a</sup> *Institute of Chemistry, University of Neuchâtel, Avenue de Bellevaux 51, CH-2000 Neuchatel, Switzerland.*

<sup>b</sup> *Institute for Organic Synthesis and Photoreactivity (ISOF) – National Research Council (CNR), Via P. Gobetti 101, 40129 Bologna, Italy.*

#### Table of contents

|                                                                                          |               |
|------------------------------------------------------------------------------------------|---------------|
| <sup>1</sup> H and <sup>13</sup> C NMR spectra of <b>P-Pyr<sub>4</sub></b>               | Pages S2      |
| <sup>1</sup> H and DOSY NMR spectrum of <b>P-Pyr<sub>4</sub>@(Rucage)<sub>4</sub></b>    | Page S3       |
| HRMS-ESI spectrum of <b>P-Pyr<sub>4</sub></b> .                                          | Page S4       |
| Modified <b>Clip</b> used as a model for DFT calculations                                | Page S5       |
| Electrochemical data for <b>Panel</b> and <b>Clip</b>                                    | Page S5-S6    |
| Additional absorption spectra                                                            | Page S6-S7    |
| Additional emission and excitation spectra                                               | Page S7-S8    |
| Decay profiles for <b>P-Pyr<sub>4</sub>@(Rucage)<sub>4</sub></b>                         | Page S8       |
| Transient absorption spectra of <b>Rucage</b> , <b>Clip</b> and <b>P-Pyr<sub>4</sub></b> | Pages S9-S10  |
| Global analysis for <b>P-Pyr<sub>4</sub>@(Rucage)<sub>4</sub></b>                        | Page S10      |
| Singlet oxygen phosphorescence                                                           | Page S11      |
| Additional theoretical results                                                           | Pages S12-S20 |
| Parameters for the energy transfer study                                                 | Pages S21-S24 |

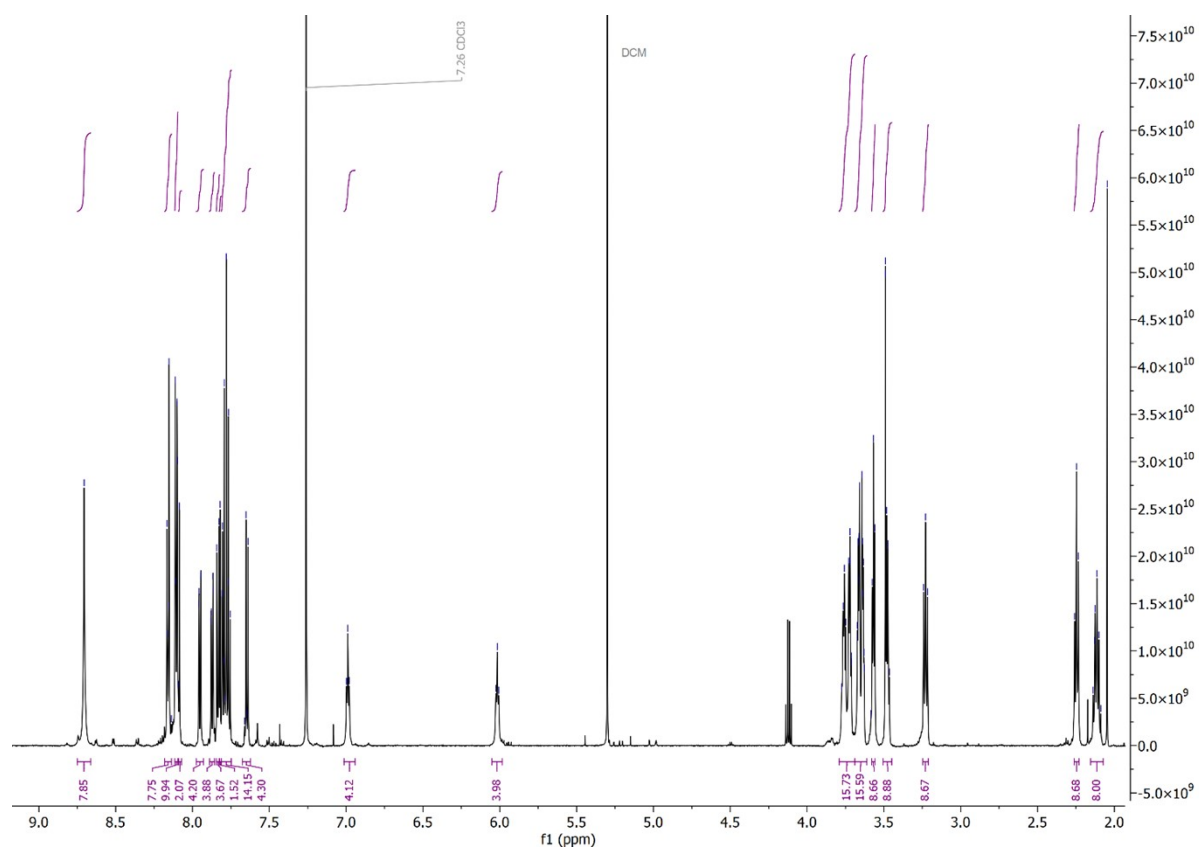

Figure S1.  $^1\text{H}$  NMR spectrum of **P-Pyr<sub>4</sub>** ( $\text{CDCl}_3$ ).

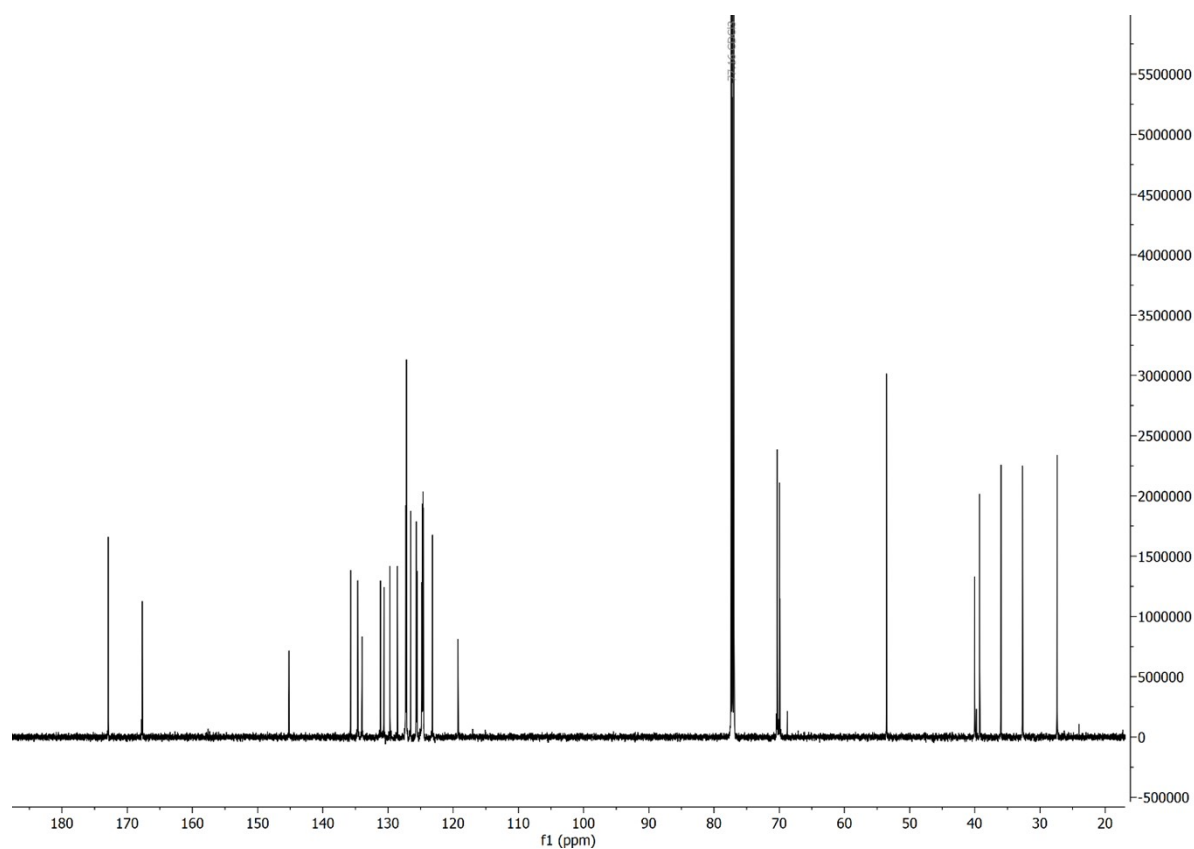

Figure S2.  $^{13}\text{C}$  NMR spectrum of **P-Pyr<sub>4</sub>** ( $\text{CDCl}_3$ ).

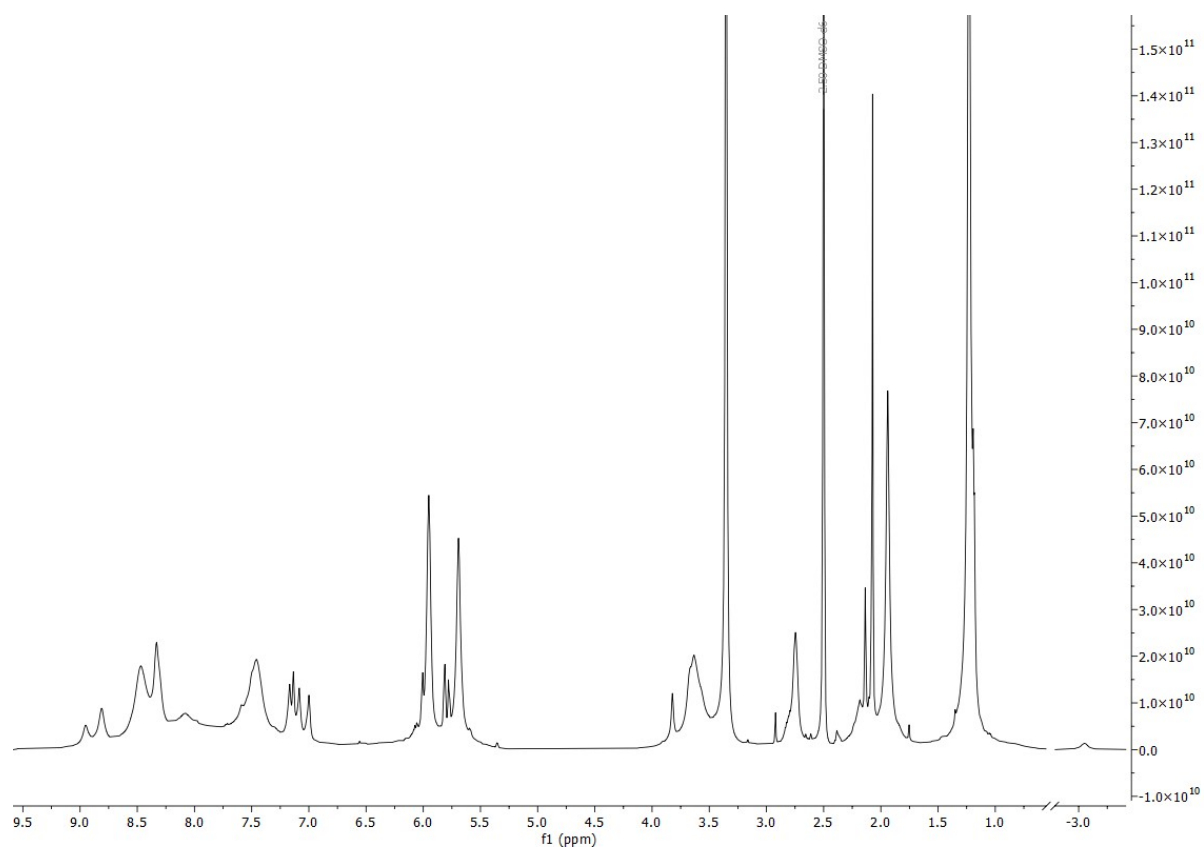

Figure S3.  $^1\text{H}$  NMR spectrum of **P-Pyr<sub>4</sub>@(Rucage)<sub>4</sub>** (DMSO).

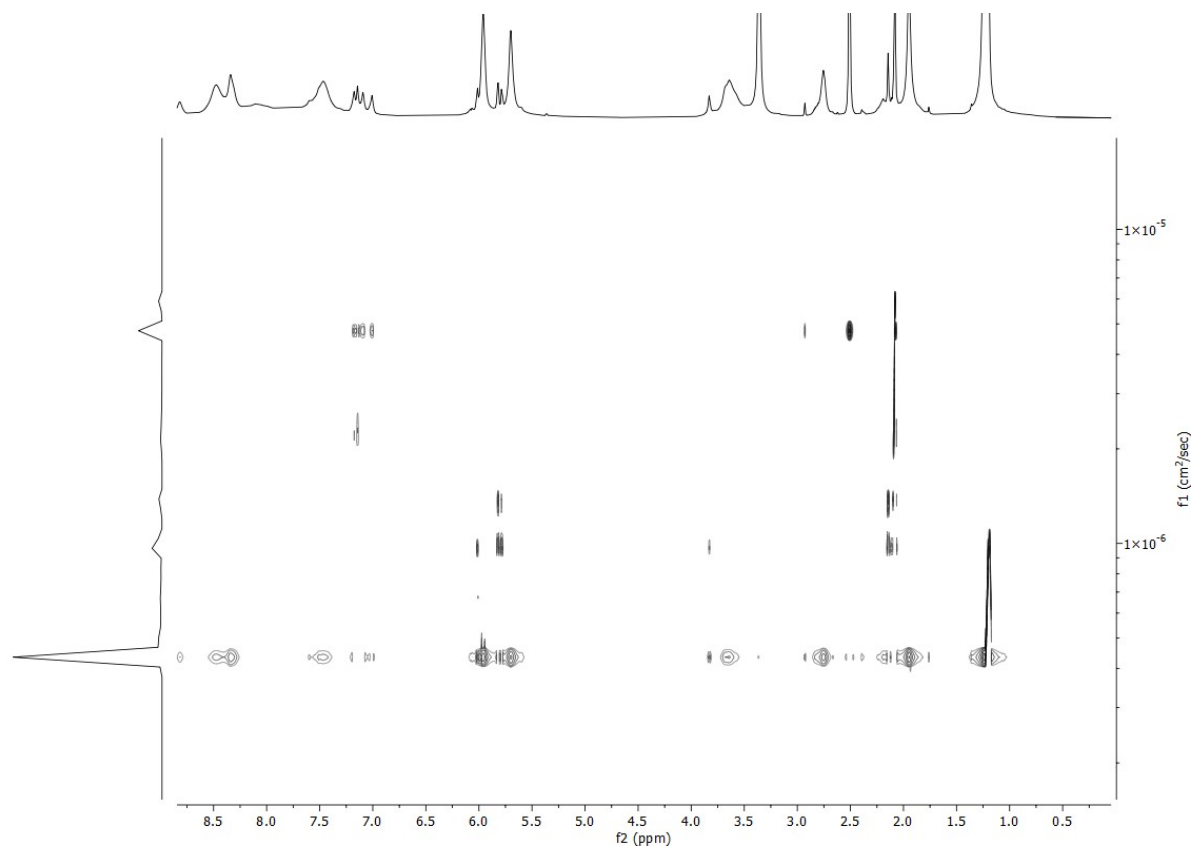

Figure S4. DOSY spectrum of **P-Pyr<sub>4</sub>@(Rucage)<sub>4</sub>** (DMSO).

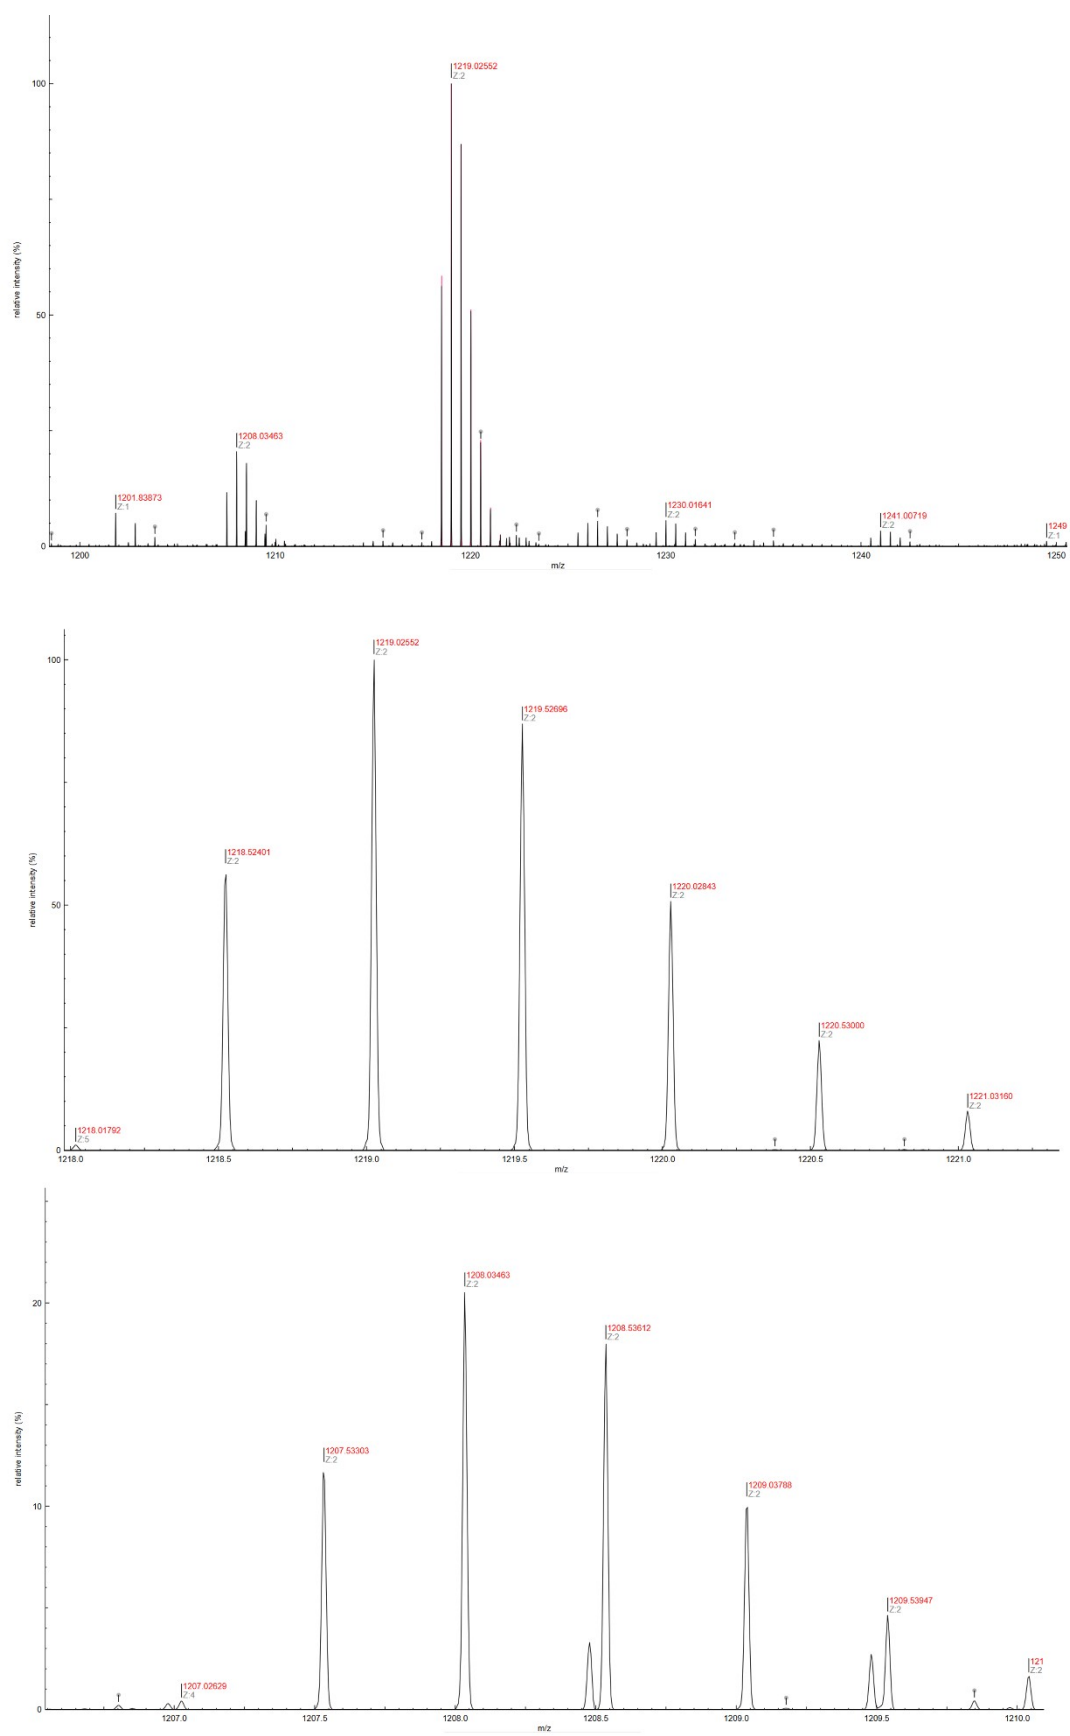

Figure S5. HRMS-ESI spectrum of **P-Pyr<sub>4</sub>**.

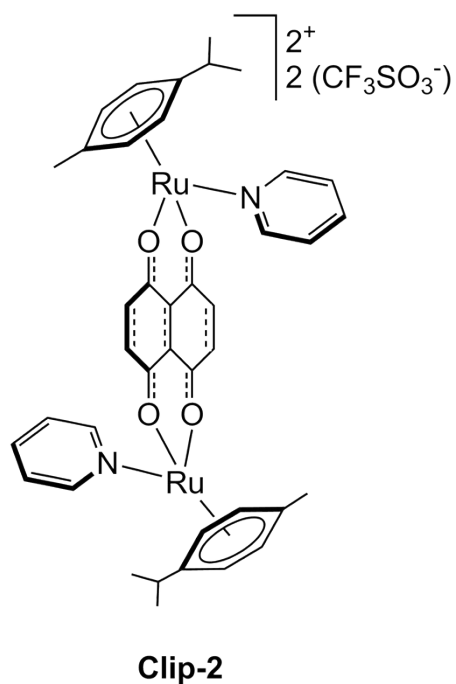

Figure S6. Modified **Clip** used as a model for DFT calculations.

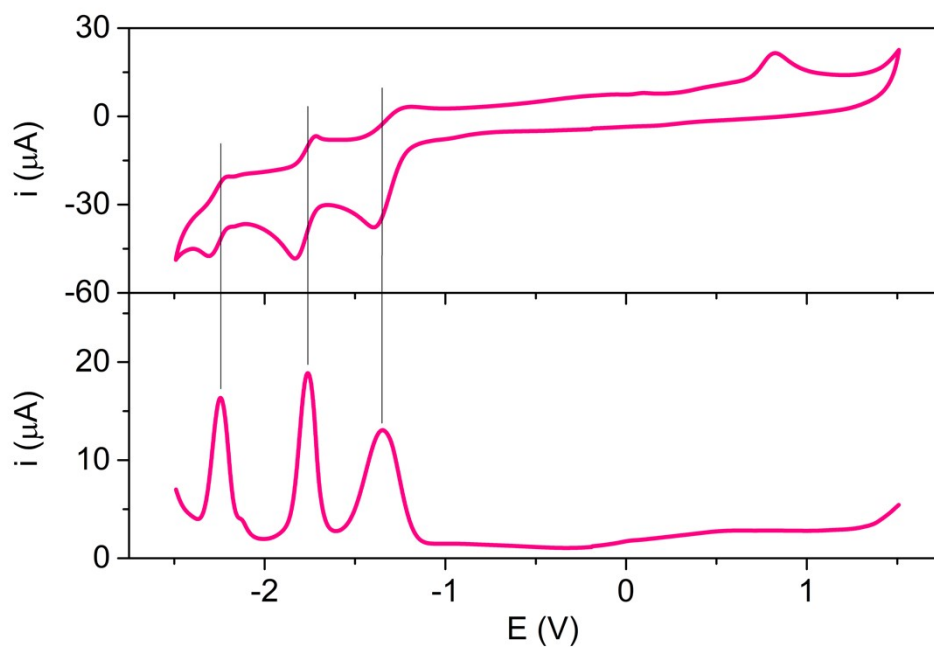

Figure S7. Cyclic (top panel) and square wave (bottom panel) voltammetry scans of **Panel** in DCM solution. CV cathodic scan starting from -0.2 V; SWV anodic and cathodic scans from -0.2 V (the sign of the cathodic current is reversed).

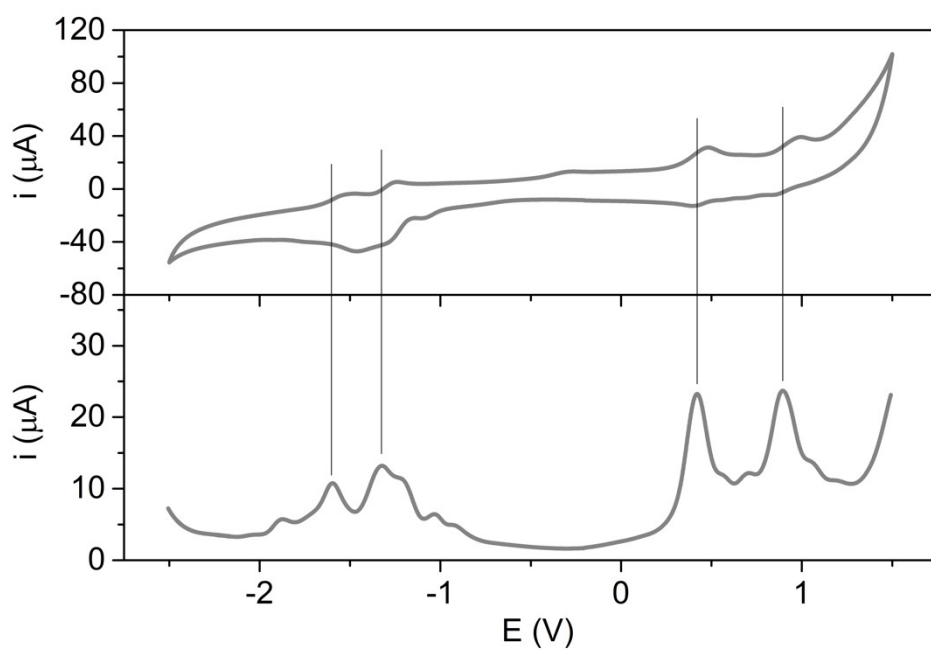

Figure S8. Cyclic (top panel) and square wave (bottom panel) voltammetry scans of **Clip** in DCM solution. CV cathodic scan starting from -0.2 V; SWV anodic and cathodic scans from -0.2 V (the sign of the cathodic current is reversed).

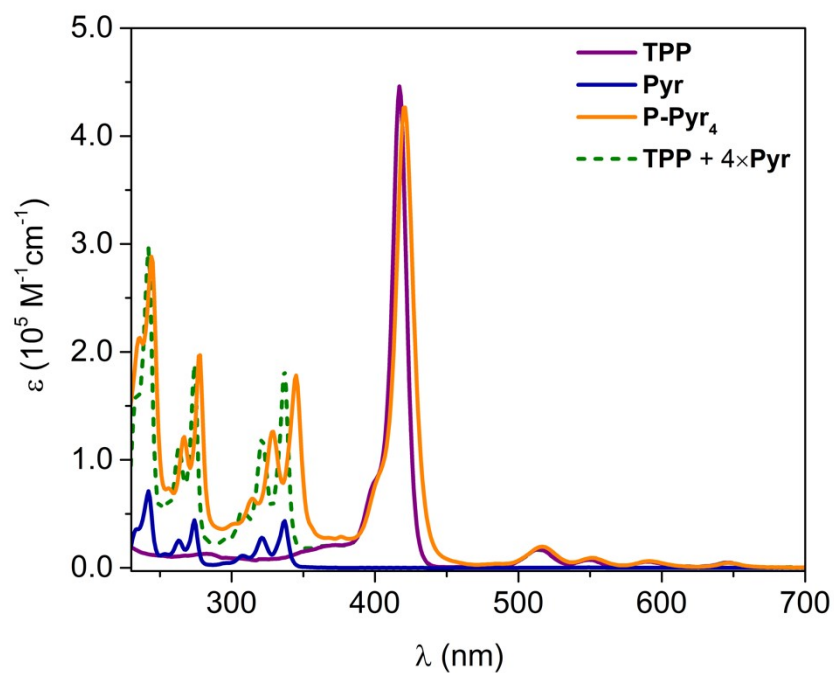

Figure S9. Absorption spectra of **P-Pyr<sub>4</sub>** and its respective models **TPP** and **Pyr** in DCM. The weighted sum of the spectra of the models is also reported.

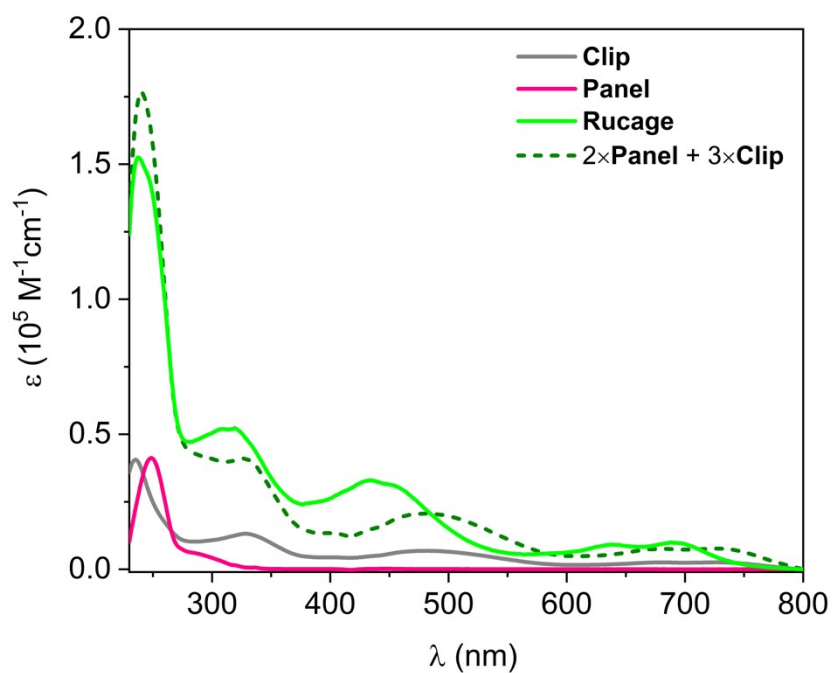

Figure S10. Absorption spectra of **Rucage** and its respective models **Clip** and **Panel** in DCM. The weighted sum of the spectra of the models is also reported.

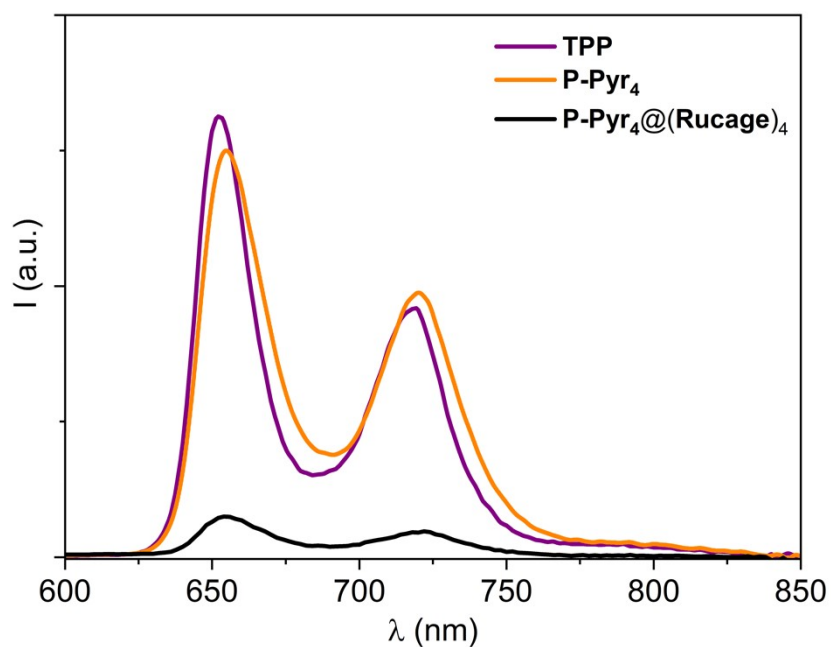

Figure S11. Corrected emission spectra of isoabsorbing solutions of **TPP**, **P-Pyr<sub>4</sub>**, and **P-Pyr<sub>4</sub>@(Rucage)<sub>4</sub>** in DCM; excitation at 515 nm ( $A_{515} = 0.13$ ). At this wavelength, 30% of the photons are absorbed by the porphyrins in the array, while the remaining 70% are absorbed by the Ru cages, so the measured intensities indicate that the porphyrin emission in **P-Pyr<sub>4</sub>@(Rucage)<sub>4</sub>** is quenched by a factor 3 with respect to the **TPP** model.

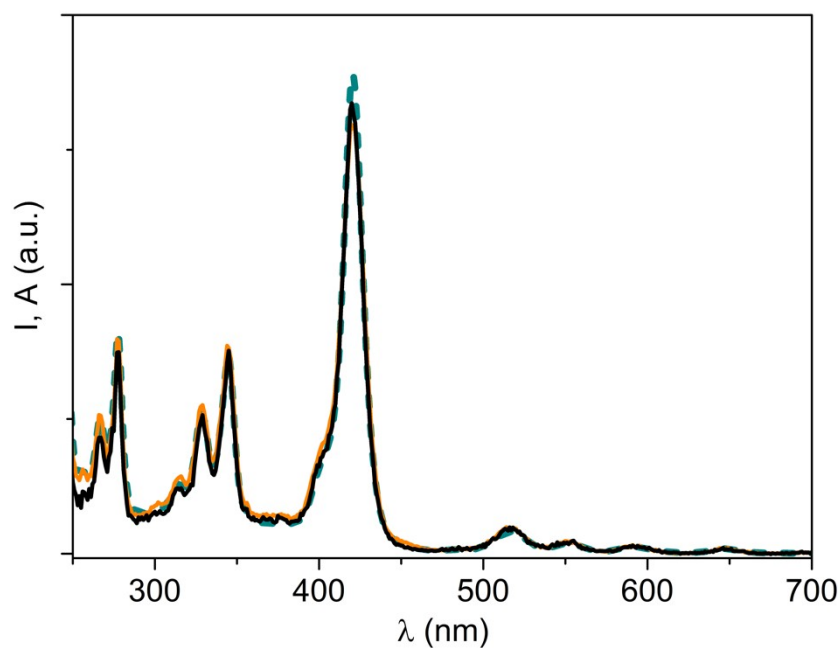

Figure S12. Arbitrarily scaled corrected excitation spectra of **P-Pyr<sub>4</sub>@(Rucage)<sub>4</sub>** (black) and **P-Pyr<sub>4</sub>** (orange) ( $\lambda_{\text{em}} = 720$  nm) and absorption spectrum of **P-Pyr<sub>4</sub>** (cyan dashed) in DCM.

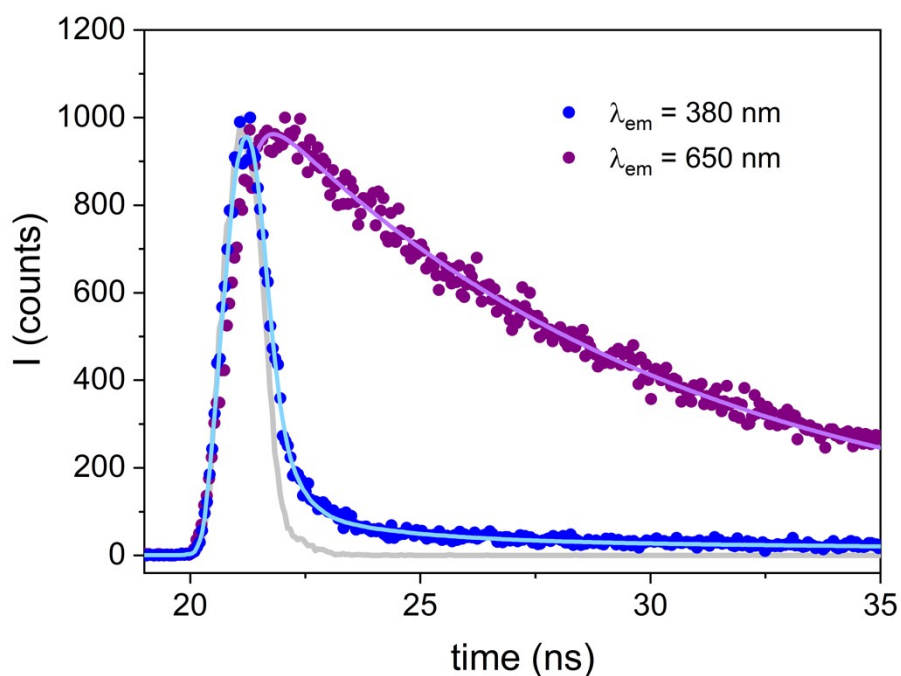

Figure S13. Decay profiles for **P-Pyr<sub>4</sub>@(Rucage)<sub>4</sub>**, measured with the single photon counting technique, upon excitation at 331 nm in DCM, at the indicated wavelengths. The lines represent the fittings (at 380 nm  $\tau = 360$  ps; at 650 nm  $\tau_1 = 350$  ps (rise),  $\tau_2 = 9.1$  ns). In grey is reported the prompt instrumental profile.

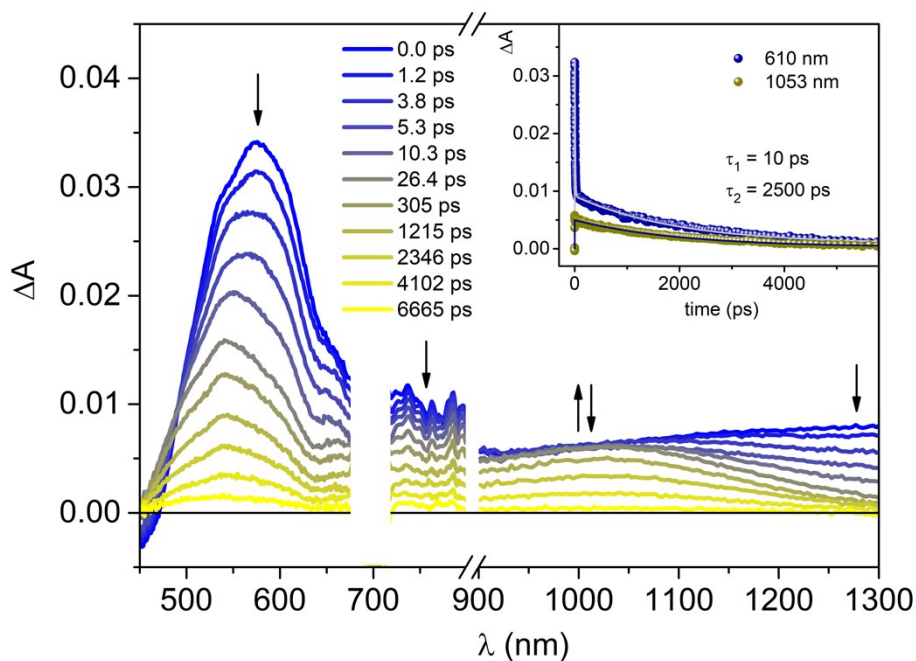

Figure S14. Transient absorption spectra of **Rucage** in DCM at different delays. Excitation at 700 nm ( $A_{700} = 0.34$ , 0.2 cm optical path, 10  $\mu\text{J}/\text{pulse}$ ). Inset:  $\Delta A$  time evolutions (dots) and fittings (lines) at the indicated wavelengths.

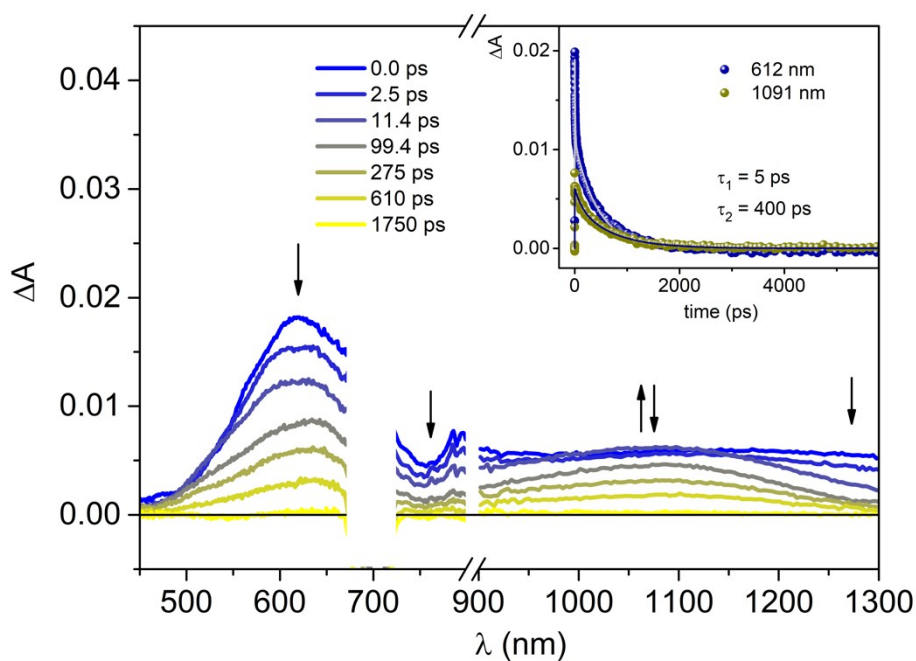

Figure S15. Transient absorption spectra of **Clip** in DCM at different delays. Excitation at 700 nm ( $A_{700} = 0.34$ , 0.2 cm optical path, 10  $\mu\text{J}/\text{pulse}$ ). Inset:  $\Delta A$  time evolutions (dots) and fittings (lines) at the indicated wavelengths.

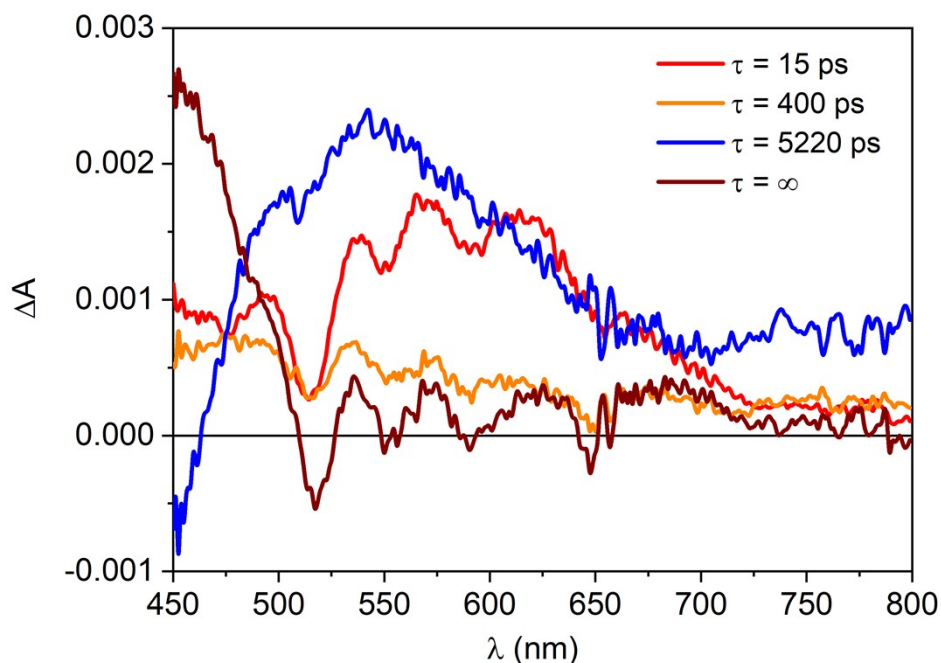

Figure S16. Spectral distribution of the amplitudes of the calculated lifetimes (indicated in the legend) from global fit analysis of the transient absorption matrix (obtained with four principal components and three expected lifetimes, with 400 ps as a fixed value, plus an infinite lifetime) of **P-Pyr<sub>4</sub>@(Rucage)<sub>4</sub>** in DCM.

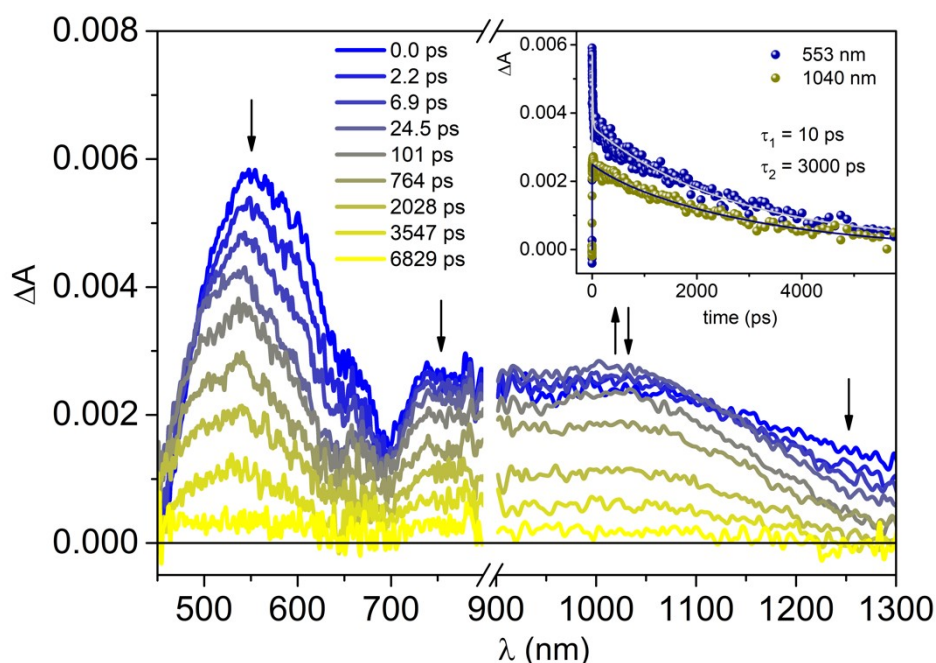

Figure S17. Transient absorption spectra of **Rucage** in DCM at different delays. Excitation at 420 nm ( $A_{420} = 0.24$ , 0.2 cm optical path, 1  $\mu\text{J}/\text{pulse}$ ). Inset:  $\Delta A$  time evolutions (dots) and fittings (lines) at the indicated wavelengths.

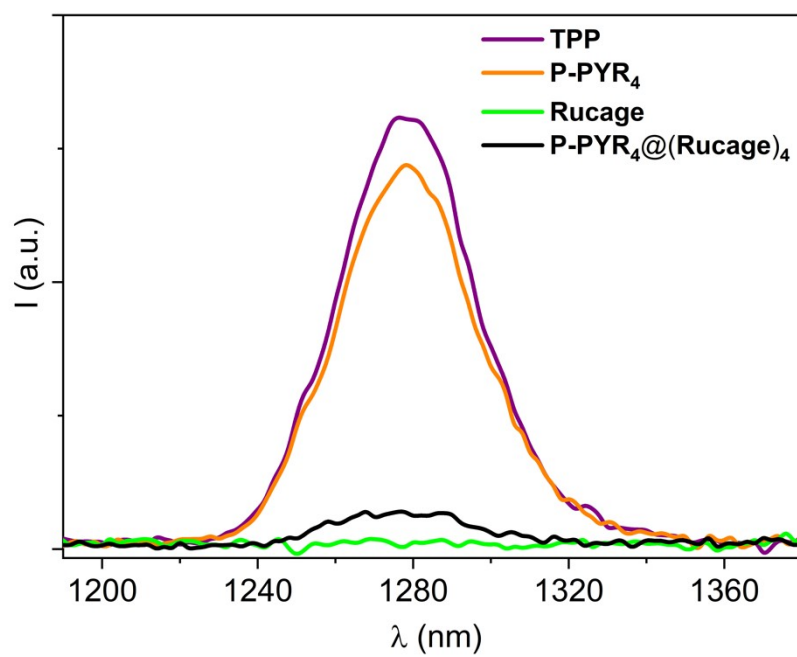

Figure S18. Singlet oxygen phosphorescence from optically matched solutions at 400 nm of **TPP**, **P-Pyr<sub>4</sub>**, **Rucage** and **P-Pyr<sub>4</sub>@(Rucage)<sub>4</sub>** in DCM ( $A_{400} = 0.3$ ).

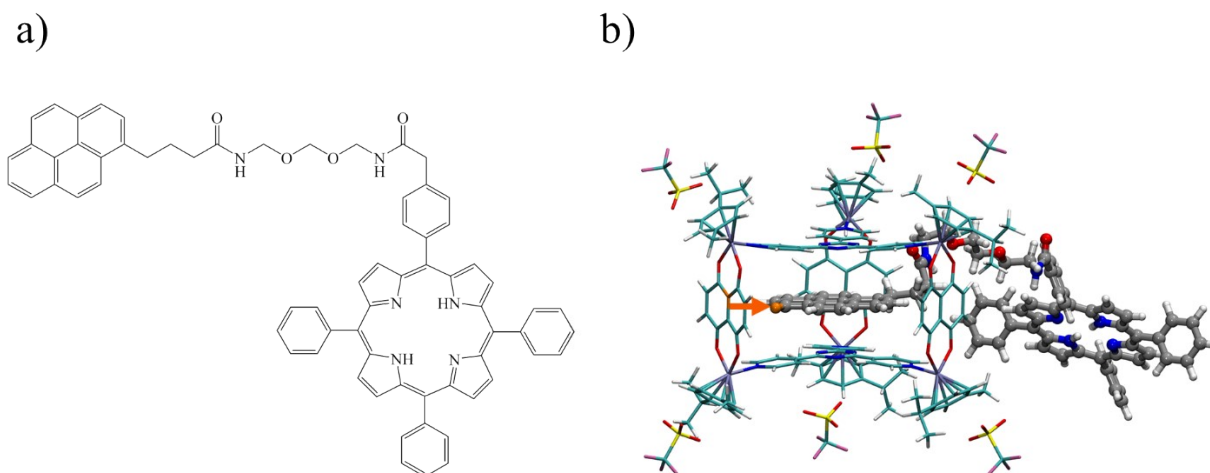

Figure S19. a) Schematic representation of **P-Pyr** model used for scan calculations; b) the optimized structure of **P-Pyr@Rucage** is the last point for scan calculation, the atoms involved in the scan are highlighted in orange with their relative scan direction. Scan started at a distance of 45.527 Å, where the two molecules no longer interact, up to 3.043 Å, a distance of minimum geometry. To facilitate the visualization of the two units, triflate anions are removed and the C atoms of **P-Pyr** (ball-and-stick model) are colored in silver, while those of **Rucage** (stick model) are reported in cyan.

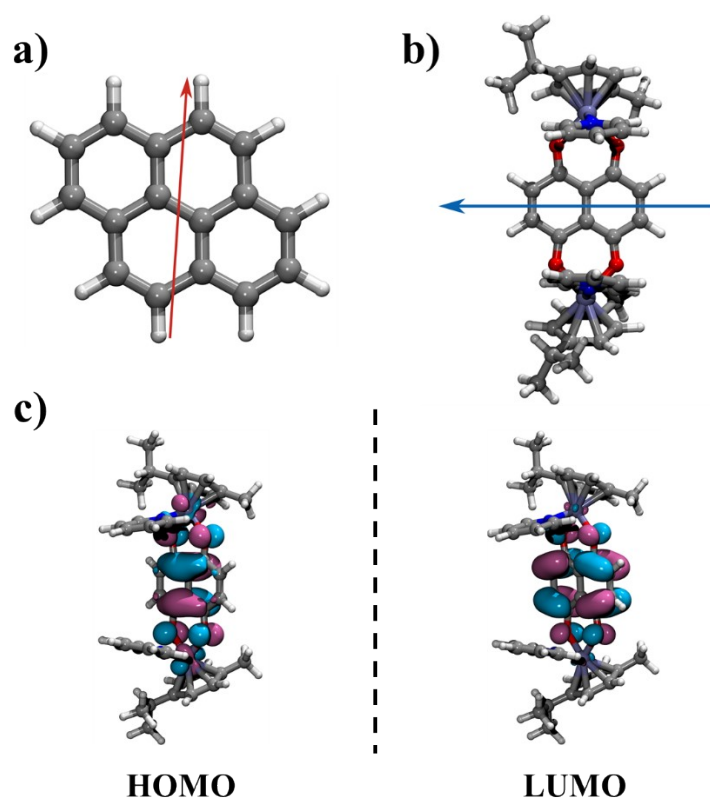

Figure S20. a) Electric dipole moment for **Pyr**; b) electric transition dipole moment between ground state and first excited states in modified **Clip-2**; c) HOMO and LUMO orbitals involved in the transitions.

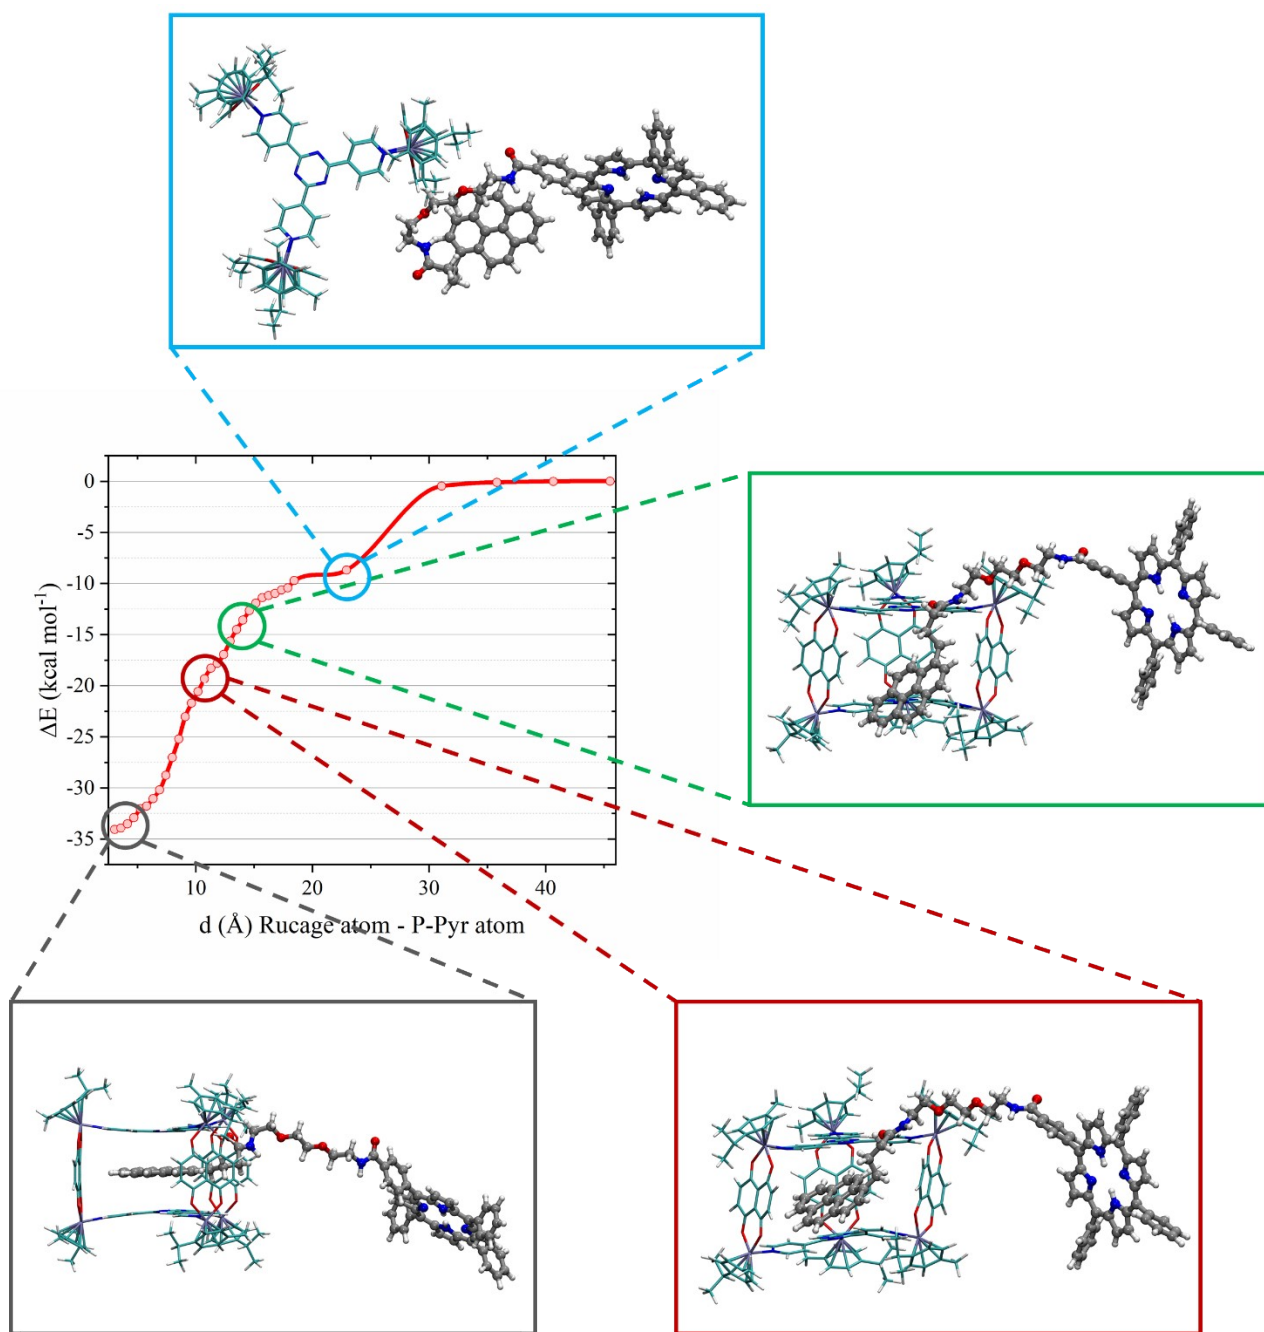

Figure S21. Scan calculations energy profile ( $\Delta E = E_{45\text{\AA}} - E_{X\text{\AA}}$ ;  $E_{45\text{\AA}}$  energy of last point;  $E_{X\text{\AA}}$  energy of the X point) with the most relevant structures obtained during the scan procedure. To facilitate the visualization of the two units, triflate anions are removed and the C atoms of **P-Pyr** (ball-and-stick model) are colored in silver, while those of **Rucage** (stick model) are reported in cyan.

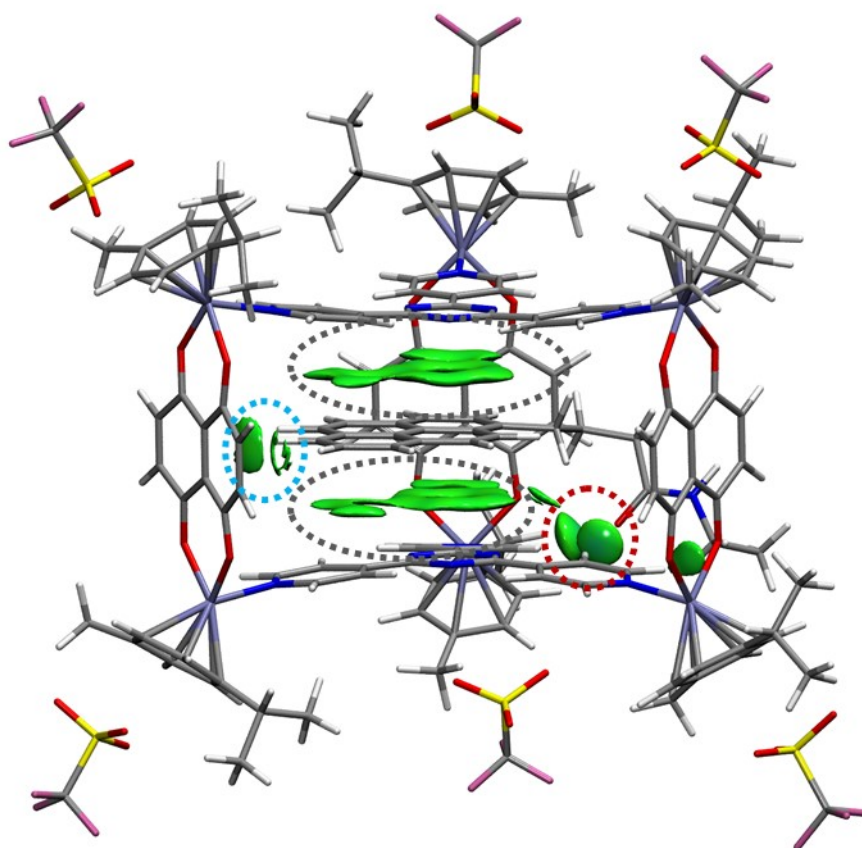

Figure S22. Minimum energy structures with the 3D IGM surfaces mapped using the product of the electron density and the second eigenvalue of the electron-density Hessian matrix. Green colored regions indicate non-covalent interactions:  $\pi$ - $\pi$  highlighted in grey, CH- $\pi$  highlighted in blue, and CH-O highlighted in red. The pegylated porphyrin moieties have been omitted for clarity.

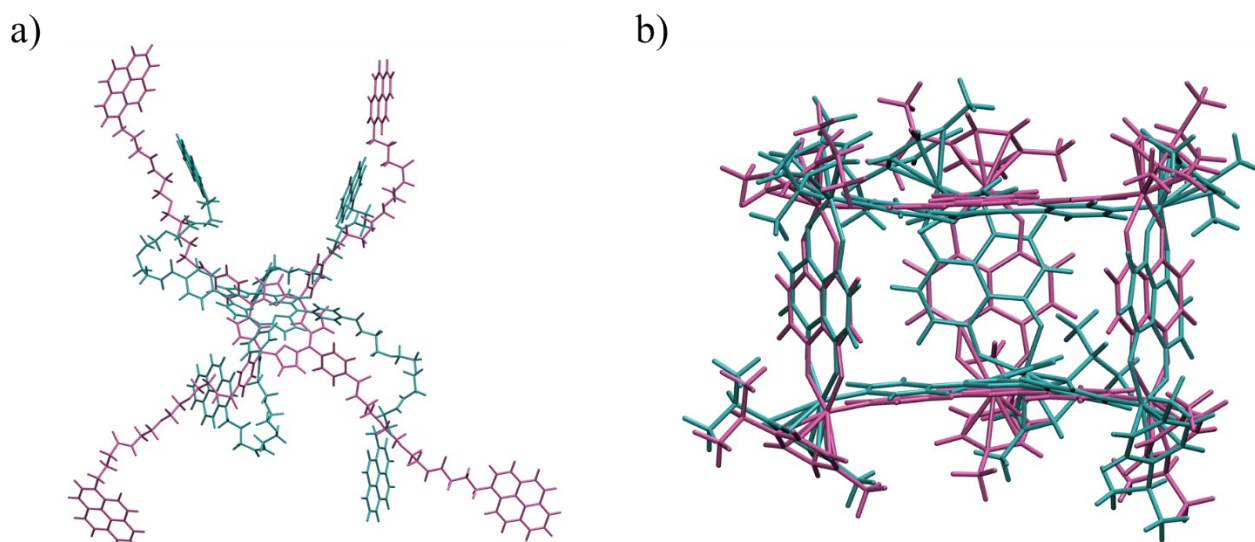

Figure S23. Overlap between optimized structures of: a) **P-Pyr<sub>4</sub>** and b) **Rucage** in **P-Pyr<sub>4</sub>@(Rucage)<sub>4</sub>\_VI** complex, where the *Def* is higher (cyan) and in the free system (purple).

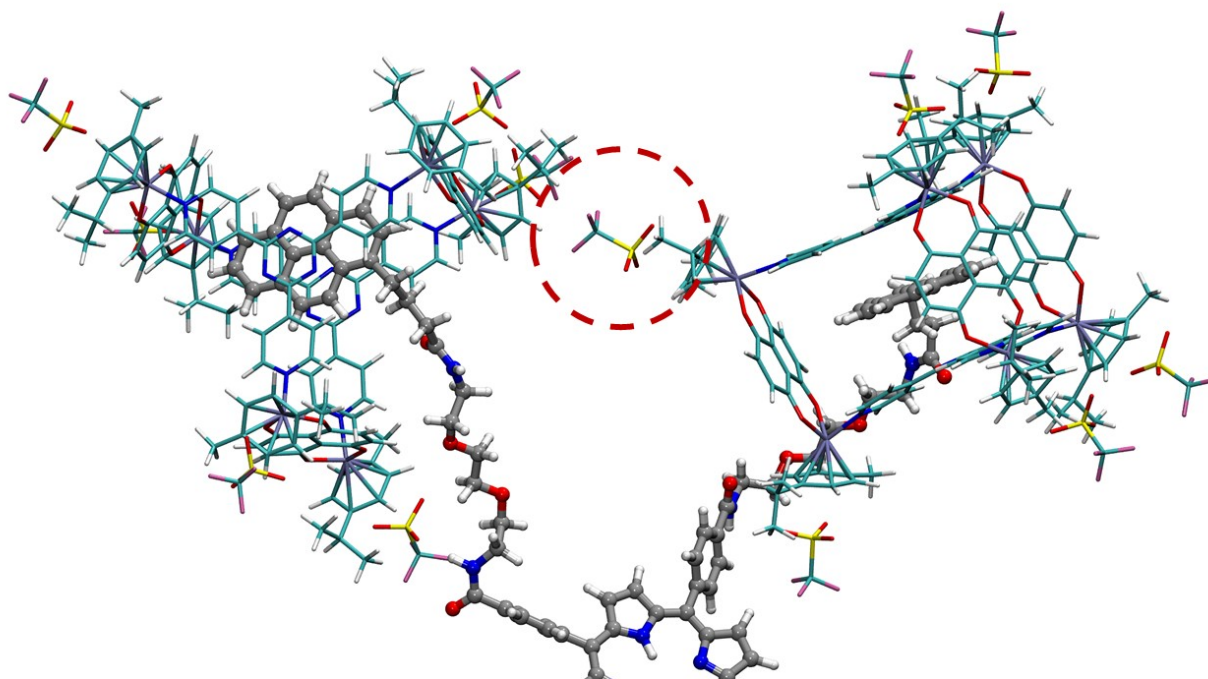

Figure S24. Detail of the optimized **P-Pyr<sub>4</sub>@(Rucage)<sub>4</sub>\_II** structure highlighting in red the **Rucage - Rucage** interaction involving a triflate anion.

Table S1. Decomposition of the  $|IE|$  to highlight the contribution of the encapsulation by a single **Rucage** to the total  $|IE|$  values for all conformers investigated, values (in kcal · mol<sup>-1</sup>) from the following equation:

$$IE = E_{E_P - \text{Pyr}_4 @ \text{Rucage} - x} - (E_{P - \text{Pyr}_4} + E_{\text{Rucage} - x})$$

where  $E_{\text{P-Pyr}_4 @ \text{Rucage} - x}$  is the energy of **P-Pyr<sub>4</sub>** and one single **Rucage**,  $E_{\text{Rucage} - x}$  is the energy of a single isolated cage at the coordinate of the complex, x indicates the number of the cage.

| $ IE $ decompositions                             | <b>P-Pyr<sub>4</sub> +<br/>Rucage-1</b> | <b>P-Pyr<sub>4</sub> +<br/>Rucage-2</b> | <b>P-Pyr<sub>4</sub> +<br/>Rucage-3</b> | <b>P-Pyr<sub>4</sub> +<br/>Rucage-4</b> |
|---------------------------------------------------|-----------------------------------------|-----------------------------------------|-----------------------------------------|-----------------------------------------|
| <b>P-Pyr<sub>4</sub>@(Rucage)<sub>4</sub>_I</b>   | 41.6                                    | 43.6                                    | 50.1                                    | 54.0                                    |
| <b>P-Pyr<sub>4</sub>@(Rucage)<sub>4</sub>_II</b>  | 47.5                                    | 43.6                                    | 56.4                                    | 54.9                                    |
| <b>P-Pyr<sub>4</sub>@(Rucage)<sub>4</sub>_III</b> | 55.9                                    | 43.9                                    | 74.6                                    | 56.0                                    |
| <b>P-Pyr<sub>4</sub>@(Rucage)<sub>4</sub>_IV</b>  | 47.4                                    | 70.3                                    | 64.7                                    | 50.9                                    |
| <b>P-Pyr<sub>4</sub>@(Rucage)<sub>4</sub>_V</b>   | 50.3                                    | 68.7                                    | 64.5                                    | 50.6                                    |
| <b>P-Pyr<sub>4</sub>@(Rucage)<sub>4</sub>_VI</b>  | 52.9                                    | 74.0                                    | 69.8                                    | 72.9                                    |

Table S2. Decomposition of  $Def$  to highlight the contribution of a single fragment (**P-Pyr<sub>4</sub>** and **Rucage**) to the total  $Def$  for all conformers investigated, values (in kcal · mol<sup>-1</sup>) from the following equation:

$$Def_{Rucage} = E_{relax\_Rucage} - E_{Rucage}$$

| <i>Def</i> decompositions                         | <b>P-Pyr<sub>4</sub></b> | <b>Rucage-1</b> | <b>Rucage-2</b> | <b>Rucage-3</b> | <b>Rucage-4</b> |
|---------------------------------------------------|--------------------------|-----------------|-----------------|-----------------|-----------------|
| <b>P-Pyr<sub>4</sub>@(Rucage)<sub>4</sub>_I</b>   | 5.8                      | 1.9             | 2.7             | 2.7             | 1.4             |
| <b>P-Pyr<sub>4</sub>@(Rucage)<sub>4</sub>_II</b>  | 10.5                     | 2.4             | 0.9             | 1.6             | 1.8             |
| <b>P-Pyr<sub>4</sub>@(Rucage)<sub>4</sub>_III</b> | 9.7                      | 5.2             | 1.3             | 6.6             | 4.7             |
| <b>P-Pyr<sub>4</sub>@(Rucage)<sub>4</sub>_IV</b>  | 13.6                     | 2.6             | 8.1             | 1.3             | 3.0             |
| <b>P-Pyr<sub>4</sub>@(Rucage)<sub>4</sub>_V</b>   | 11.9                     | 4.3             | 11.8            | 1.9             | 2.7             |
| <b>P-Pyr<sub>4</sub>@(Rucage)<sub>4</sub>_VI</b>  | 10.2                     | 8.6             | 15.6            | 9.3             | 7.44            |

Table S3. Interchromophoric donor–to–acceptor distances (**Pyr–Porph**) in Å.<sup>a</sup>

|                              | I      | II     | III    | IV     | V      | VI     |
|------------------------------|--------|--------|--------|--------|--------|--------|
| <b>Porph-Pyr<sub>1</sub></b> | 26.748 | 20.749 | 14.788 | 14.160 | 13.582 | 13.081 |
| <b>Porph-Pyr<sub>2</sub></b> | 26.922 | 23.968 | 24.139 | 11.004 | 11.801 | 10.382 |
| <b>Porph-Pyr<sub>3</sub></b> | 22.792 | 25.066 | 22.627 | 26.298 | 21.188 | 20.081 |
| <b>Porph-Pyr<sub>4</sub></b> | 23.803 | 25.618 | 21.591 | 27.231 | 24.019 | 17.334 |

<sup>a</sup> Distances between the center of the N<sub>4</sub> porphyrin ring (**Porph**) and the center of the pyrene moieties (**Pyr<sub>n</sub>**) in the **P-Pyr<sub>4</sub>@(Rucage)<sub>4</sub>** system (see Figure S25), calculated from the molecular modeling for the conformations I–VI; average distance  $d = 20.4 \pm 5.6$  Å.

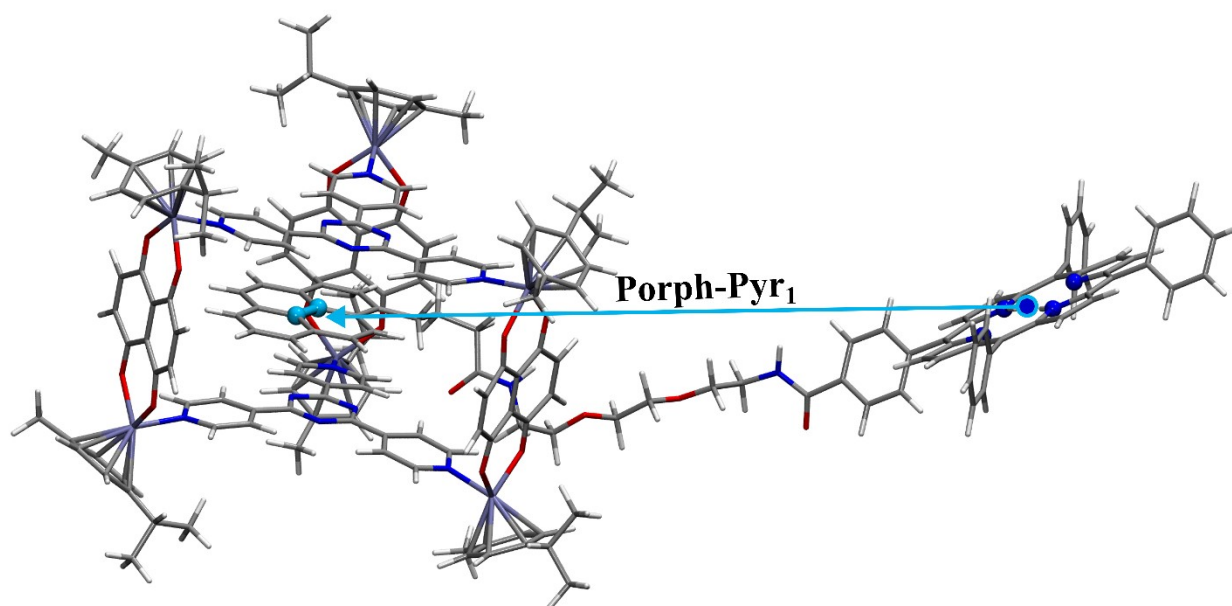

Figure S25. Sketch of the calculated interchromophoric distances **Porph-Pyr<sub>n</sub>**; as sake of clarity, only one over four arms of the porphyrin centre is shown.

Table S4. Interchromophoric donor-to-acceptor distances (**Pyr-Rucage**) in Å.<sup>a</sup>

|                                           | I     | II    | III   | IV    | V     | VI    |
|-------------------------------------------|-------|-------|-------|-------|-------|-------|
| <b>Pyr<sub>1</sub>-Ruc<sub>1</sub></b>    | 7.321 | 6.878 | 8.660 | 9.030 | 6.712 | 6.736 |
| <b>Pyr<sub>1</sub>-Ruc<sub>2</sub></b>    | 7.083 | 7.368 | 6.925 | 6.955 | 7.967 | 7.492 |
| <b>Pyr<sub>1</sub>-Ruc<sub>3</sub></b>    | 8.744 | 8.906 | 7.178 | 7.142 | 8.631 | 8.631 |
| <b>Pyr<sub>2</sub>-Ruc<sub>1</sub>'</b>   | 6.766 | 8.207 | 7.543 | 7.108 | 6.554 | 7.331 |
| <b>Pyr<sub>2</sub>-Ruc<sub>2</sub>'</b>   | 8.974 | 8.517 | 6.710 | 8.904 | 6.816 | 8.872 |
| <b>Pyr<sub>2</sub>-Ruc<sub>3</sub>'</b>   | 7.349 | 7.140 | 8.868 | 7.013 | 8.756 | 6.659 |
| <b>Pyr<sub>3</sub>-Ruc<sub>1</sub>''</b>  | 6.777 | 7.020 | 8.312 | 7.832 | 7.107 | 6.975 |
| <b>Pyr<sub>3</sub>-Ruc<sub>2</sub>''</b>  | 8.967 | 8.529 | 8.120 | 8.612 | 8.790 | 7.670 |
| <b>Pyr<sub>3</sub>-Ruc<sub>3</sub>''</b>  | 6.501 | 7.483 | 6.407 | 6.776 | 7.045 | 8.081 |
| <b>Pyr<sub>4</sub>-Ruc<sub>1</sub>'''</b> | 6.848 | 7.298 | 8.956 | 7.477 | 6.747 | 8.971 |
| <b>Pyr<sub>4</sub>-Ruc<sub>2</sub>'''</b> | 9.075 | 8.331 | 7.336 | 6.798 | 8.862 | 6.796 |
| <b>Pyr<sub>4</sub>-Ruc<sub>3</sub>'''</b> | 7.218 | 7.203 | 6.846 | 8.800 | 7.483 | 7.542 |

<sup>a</sup> Distances between the center of the pyrene moieties (**Pyr<sub>n</sub>**) and the center of the naphthoquinonato pillars (**Ruc<sub>n</sub>**) in the **P-Pyr<sub>4</sub>@(Rucage)<sub>4</sub>** system (see Figure S26), calculated from the molecular modeling for the conformations I–VI; average distance  $d = 7.7 \pm 0.8$  Å.

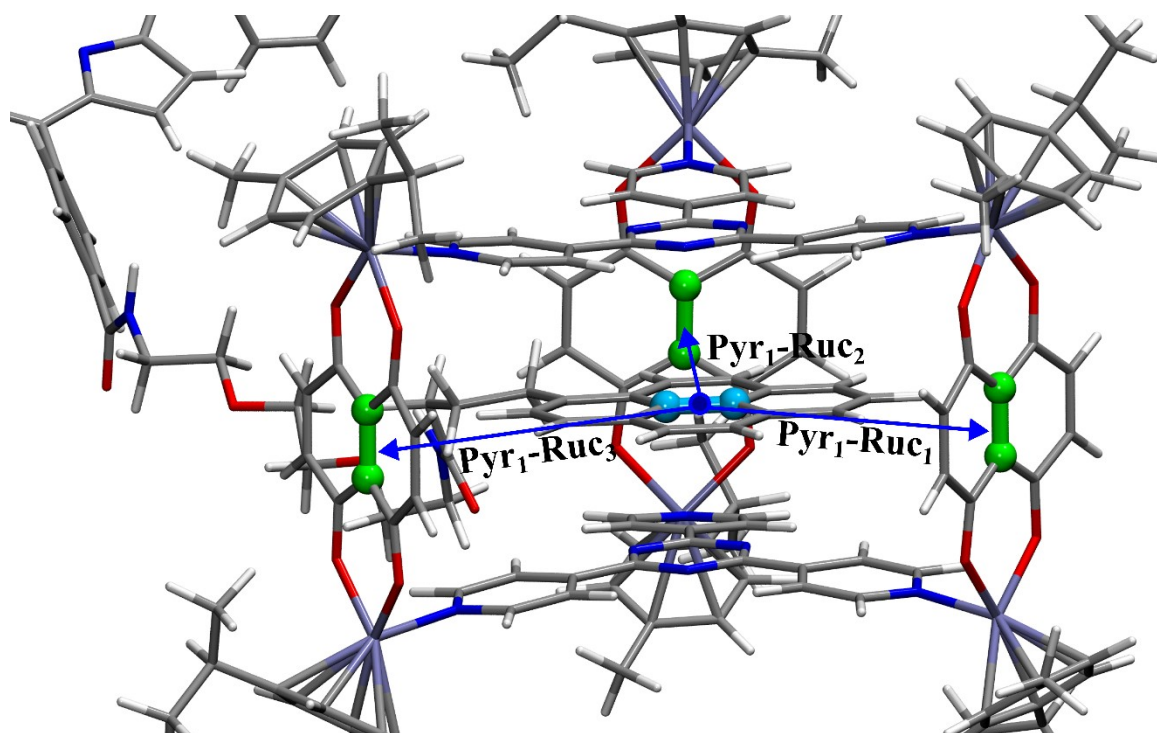

Figure S26. Sketch of the calculated interchromophoric distances **Pyr<sub>n</sub>-Ruc<sub>n</sub>**; as sake of clarity, only one over four arms of the porphyrin centre is shown.

Table S5. Interchromophoric donor-to-acceptor distances (**Porph-Rucage**) in Å.<sup>a</sup>

|                                 | I      | II     | III    | IV     | V      | VI     |
|---------------------------------|--------|--------|--------|--------|--------|--------|
| <b>Porph-Ruc<sub>1</sub></b>    | 25.968 | 14.989 | 5.740  | 4.986  | 5.473  | 5.353  |
| <b>Porph-Ruc<sub>2</sub></b>    | 19.338 | 24.186 | 15.212 | 15.354 | 16.720 | 16.566 |
| <b>Porph-Ruc<sub>3</sub></b>    | 27.792 | 25.845 | 18.323 | 18.060 | 18.144 | 18.658 |
| <b>Porph-Ruc<sub>1</sub>'</b>   | 15.192 | 19.646 | 17.451 | 5.456  | 5.086  | 4.793  |
| <b>Porph-Ruc<sub>2</sub>'</b>   | 23.050 | 23.801 | 29.079 | 18.172 | 18.136 | 17.583 |
| <b>Porph-Ruc<sub>3</sub>'</b>   | 28.173 | 29.894 | 25.068 | 16.894 | 15.347 | 13.670 |
| <b>Porph-Ruc<sub>1</sub>''</b>  | 20.967 | 19.139 | 16.601 | 19.942 | 20.129 | 13.552 |
| <b>Porph-Ruc<sub>2</sub>''</b>  | 30.728 | 24.492 | 24.215 | 27.037 | 13.124 | 12.720 |
| <b>Porph-Ruc<sub>3</sub>''</b>  | 26.023 | 31.622 | 25.615 | 33.019 | 30.214 | 23.738 |
| <b>Porph-Ruc<sub>1</sub>'''</b> | 25.588 | 18.287 | 15.759 | 18.976 | 20.394 | 17.639 |
| <b>Porph-Ruc<sub>2</sub>'''</b> | 21.734 | 31.436 | 23.982 | 26.821 | 27.319 | 16.219 |
| <b>Porph-Ruc<sub>3</sub>'''</b> | 31.671 | 25.863 | 26.760 | 29.578 | 30.199 | 16.219 |

<sup>a</sup> Distances between the center of the N4 porphyrin ring (**Porph**) and the center of the naphthoquinonato pillars (**Ruc<sub>n</sub>**) in the **P-Pyr<sub>4</sub>@(Rucage)<sub>4</sub>** system (see Figure S27), calculated from the molecular modeling for the conformations I–VI; average distance  $d = 20.3 \pm 7.3$  Å.

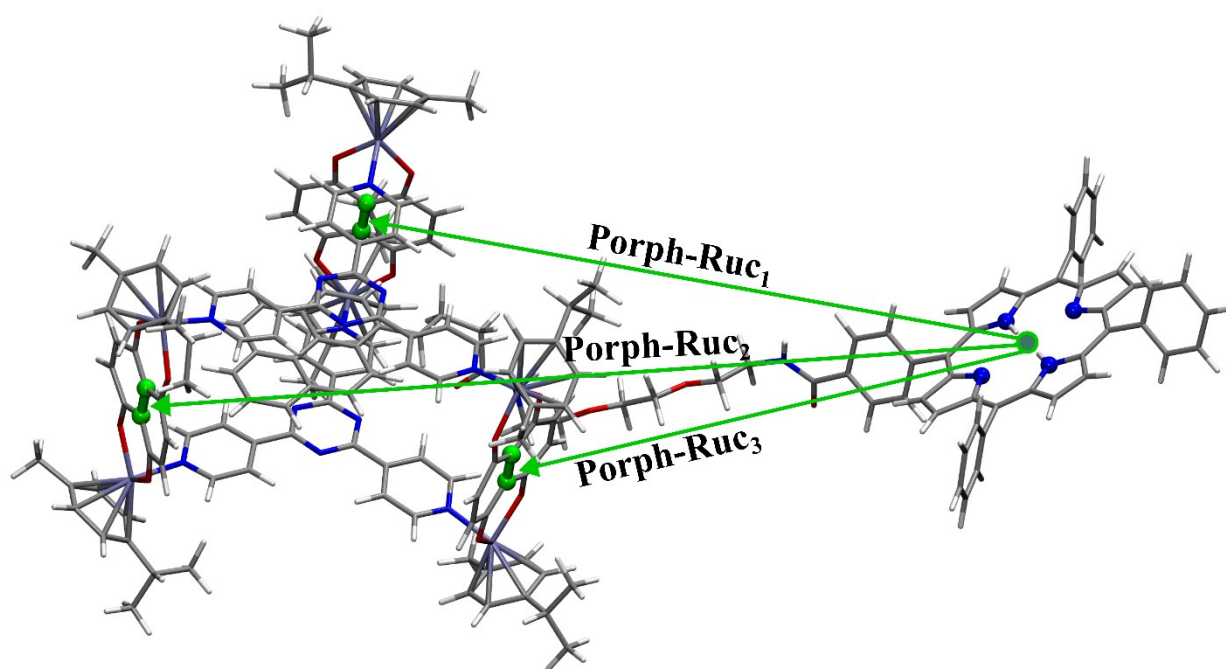

Figure S27. Sketch of the calculated interchromophoric distances **Porph-Ruc<sub>n</sub>**; as sake of clarity, only one over four arms of the porphyrin centre is shown.

Table S6. **Porph–Ru** distances (Å) in the different conformers (I–VI).<sup>a</sup>

|                                | I      | II     | III    | IV     | V      | VI     |
|--------------------------------|--------|--------|--------|--------|--------|--------|
| <b>Porph–Ru<sub>1</sub></b>    | 14.896 | 16.553 | 6.047  | 6.752  | 6.772  | 6.132  |
| <b>Porph–Ru<sub>2</sub></b>    | 17.181 | 22.298 | 8.131  | 6.417  | 6.738  | 6.738  |
| <b>Porph–Ru<sub>3</sub></b>    | 27.861 | 21.698 | 15.509 | 15.979 | 16.237 | 14.681 |
| <b>Porph–Ru<sub>4</sub></b>    | 29.119 | 25.739 | 15.985 | 15.603 | 15.555 | 14.468 |
| <b>Porph–Ru<sub>5</sub></b>    | 22.983 | 27.949 | 18.514 | 18.440 | 18.571 | 17.946 |
| <b>Porph–Ru<sub>6</sub></b>    | 23.986 | 31.536 | 19.158 | 18.307 | 18.581 | 18.117 |
| <b>Porph–Ru<sub>1</sub>'</b>   | 16.210 | 12.563 | 15.057 | 5.036  | 5.077  | 5.154  |
| <b>Porph–Ru<sub>2</sub>'</b>   | 23.945 | 17.394 | 19.813 | 8.937  | 8.942  | 8.751  |
| <b>Porph–Ru<sub>3</sub>'</b>   | 23.506 | 22.450 | 23.811 | 16.717 | 17.461 | 17.259 |
| <b>Porph–Ru<sub>4</sub>'</b>   | 29.675 | 25.738 | 26.381 | 18.166 | 16.516 | 20.128 |
| <b>Porph–Ru<sub>5</sub>'</b>   | 25.469 | 24.732 | 27.593 | 17.782 | 19.611 | 17.077 |
| <b>Porph–Ru<sub>6</sub>'</b>   | 31.256 | 27.077 | 30.350 | 19.672 | 17.889 | 16.912 |
| <b>Porph–Ru<sub>1</sub>''</b>  | 19.239 | 17.251 | 13.770 | 18.554 | 16.708 | 14.981 |
| <b>Porph–Ru<sub>2</sub>''</b>  | 25.677 | 20.688 | 21.058 | 20.642 | 22.716 | 21.478 |
| <b>Porph–Ru<sub>3</sub>''</b>  | 22.972 | 26.625 | 23.766 | 25.875 | 16.226 | 16.162 |
| <b>Porph–Ru<sub>4</sub>''</b>  | 29.547 | 25.537 | 28.608 | 25.718 | 19.865 | 19.363 |
| <b>Porph–Ru<sub>5</sub>''</b>  | 28.855 | 32.426 | 22.338 | 31.684 | 25.134 | 27.813 |
| <b>Porph–Ru<sub>6</sub>''</b>  | 33.756 | 30.389 | 27.339 | 32.491 | 28.294 | 24.814 |
| <b>Porph–Ru<sub>1</sub>'''</b> | 18.431 | 20.272 | 13.231 | 16.614 | 15.249 | 12.843 |
| <b>Porph–Ru<sub>2</sub>'''</b> | 25.045 | 18.768 | 19.885 | 22.876 | 22.415 | 12.141 |
| <b>Porph–Ru<sub>3</sub>'''</b> | 24.087 | 25.370 | 24.299 | 25.115 | 23.872 | 23.270 |
| <b>Porph–Ru<sub>4</sub>'''</b> | 29.202 | 24.006 | 28.716 | 29.680 | 28.917 | 23.431 |
| <b>Porph–Ru<sub>5</sub>'''</b> | 28.975 | 32.169 | 22.248 | 27.887 | 25.365 | 15.943 |
| <b>Porph–Ru<sub>6</sub>'''</b> | 33.495 | 31.157 | 26.847 | 32.207 | 30.452 | 15.460 |

<sup>a</sup>Distances between the center of the N<sub>4</sub> porphyrin ring (**Porph**) and the ruthenium atoms (**Ru<sub>n</sub>**) in the **P-Pyr<sub>4</sub>@(Ru<sub>cage</sub>)<sub>4</sub>** system (see Figure S28), calculated from the molecular modeling for the conformations I–VI; average distance  $d = 20.8 \pm 7.0$  Å.

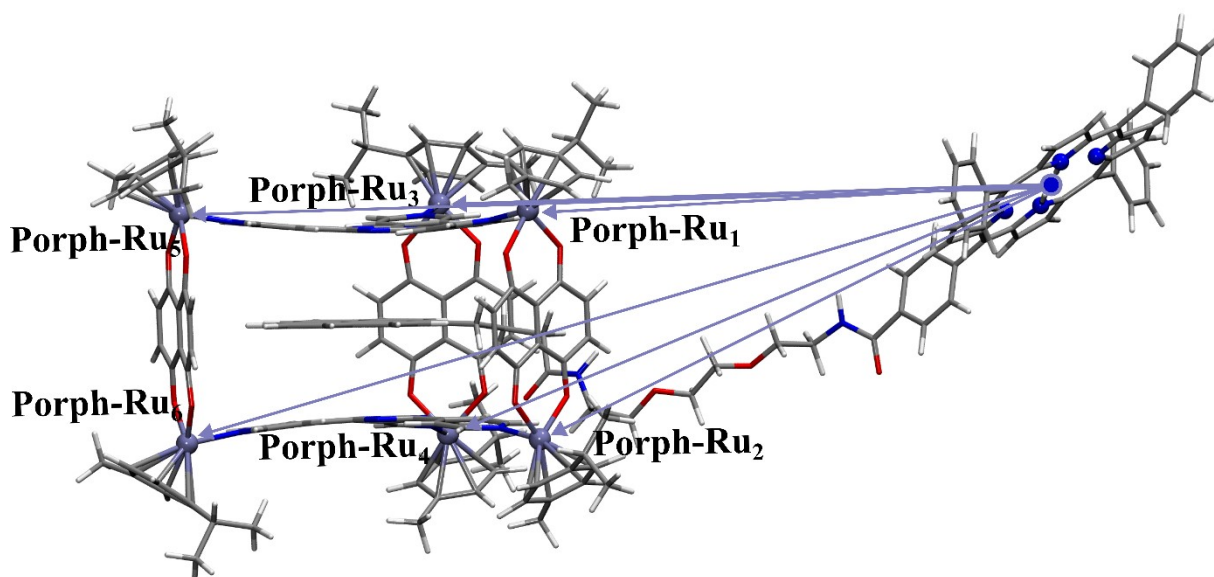

Figure S28. Sketch of the calculated interchromophoric distances **Porph–Ru<sub>n</sub>**; as sake of clarity, only one over four arms of the porphyrin centre is shown.

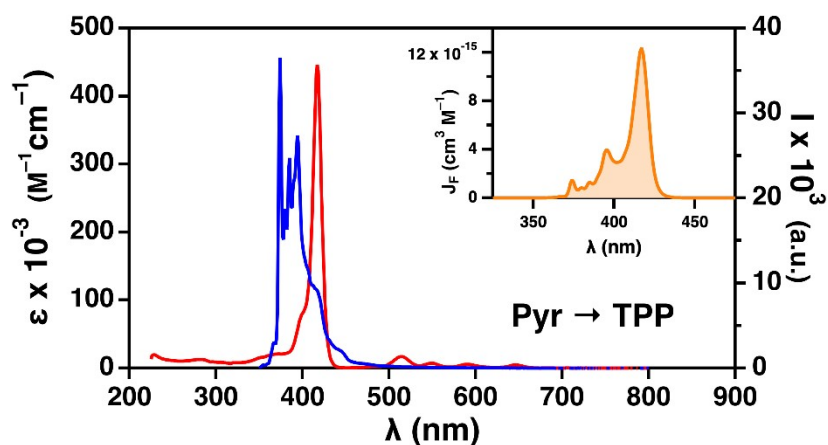

Figure S29. Area normalized emission spectrum of the **Pyr** donor (blue) and the absorption coefficient spectrum of the **TPP** acceptor (red); spectral overlap (inset).

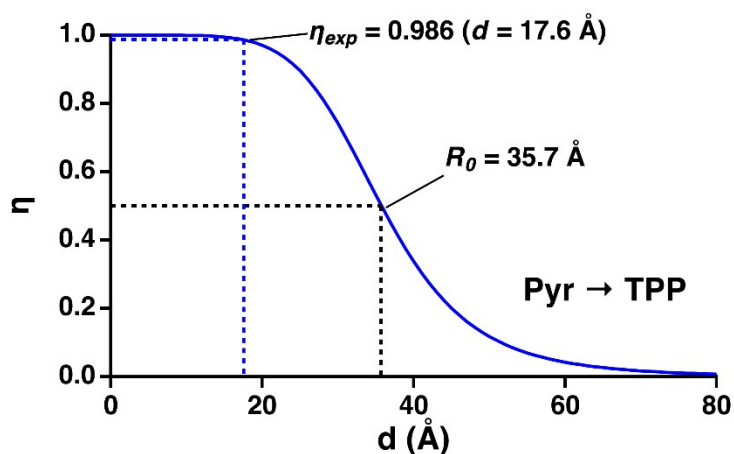

Figure S30. Efficiency of the **Pyr** to **TPP** energy transfer process calculated according to the Förster model ( $\kappa^2 = 2 / 3$ ).

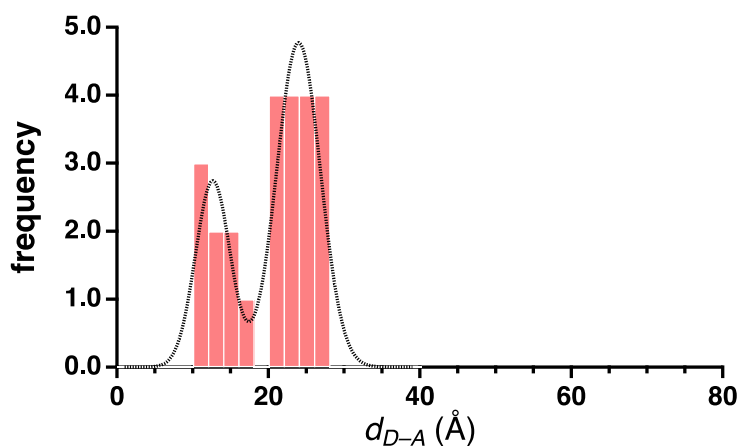

Figure S31. Distribution of the distances between the center of the pyrenyl moieties and the center of the  $N_4$  porphyrin ring in the **P-Pyr<sub>4</sub>@(Rucage)<sub>4</sub>** system, calculated from the molecular modeling (Table S3); the black dotted line is the gaussian interpolation of the distribution.

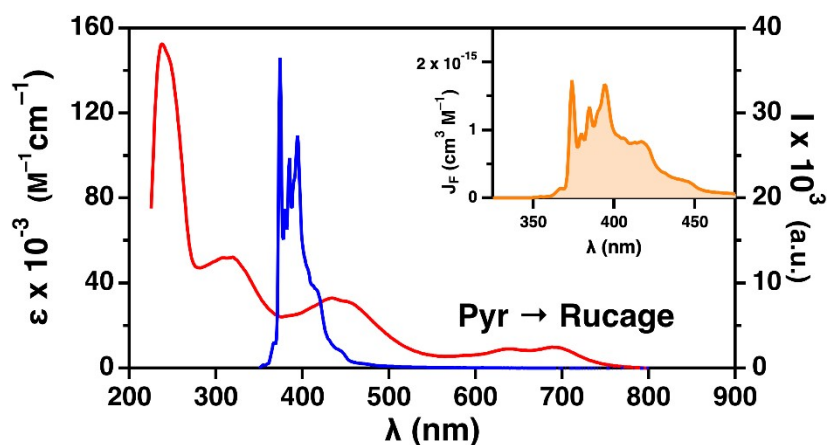

Figure S32. Area normalized emission spectrum of the **Pyr** donor (blue) and absorption coefficient spectrum of the **Rucage** acceptor (red); spectral overlap (inset).

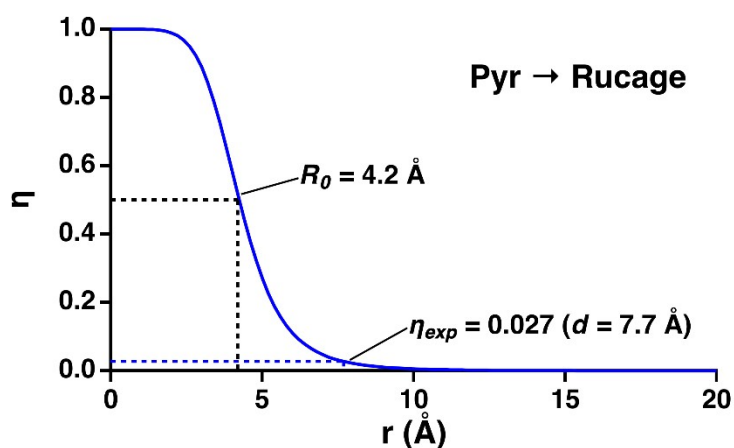

Figure S33. Efficiency of the **Pyr** to **Rucage** energy transfer process calculated according to the Förster model ( $\kappa^2 \sim 0$ ).

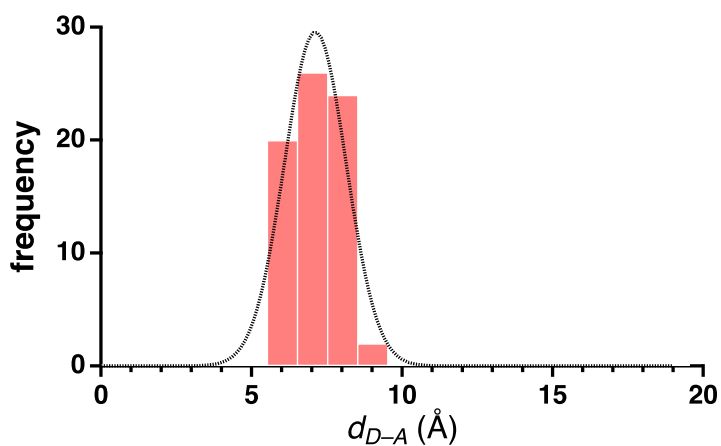

Figure S34. Distribution of the distances between the center of the pyrenyl moieties and the center of the naphthoquinonato pillars in the **P-Pyr<sub>4</sub>@(Rucage)<sub>4</sub>** system, calculated from the molecular modeling (Table S4); the black dotted line is the gaussian interpolation of the distribution.

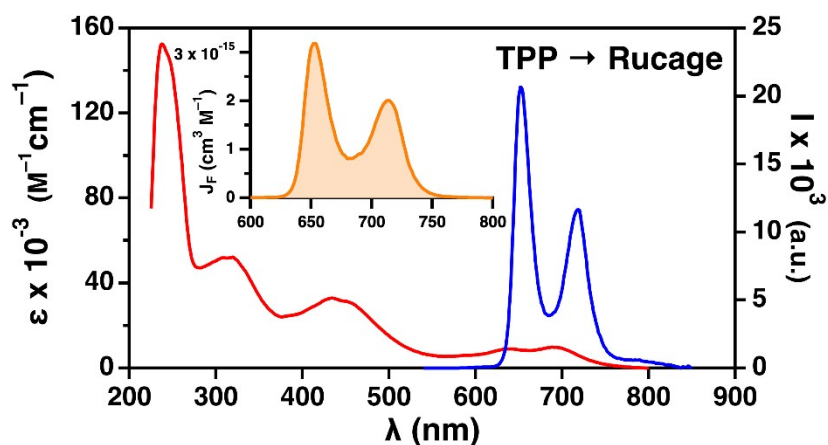

Figure S35. Area normalized emission spectrum of the **TPP** donor (blue) and the absorption coefficient spectrum of the **Rucage** acceptor (red); spectral overlap (inset).

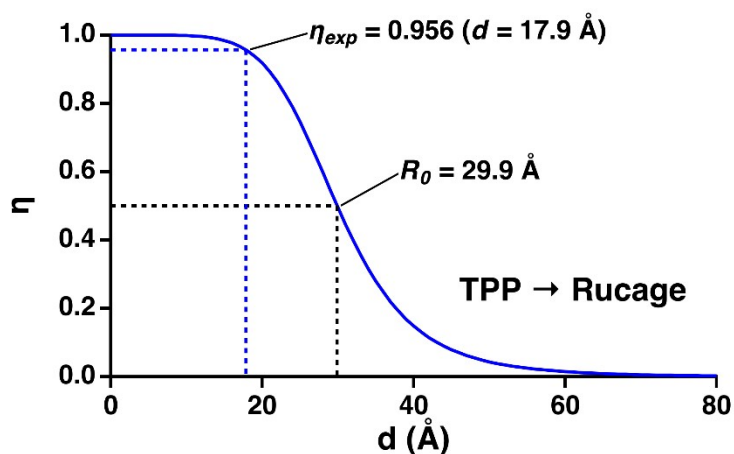

Figure S36. Efficiency of the **TPP** to **Rucage** energy transfer process calculated according to the Förster model ( $\kappa^2 = 2 / 3$ ).

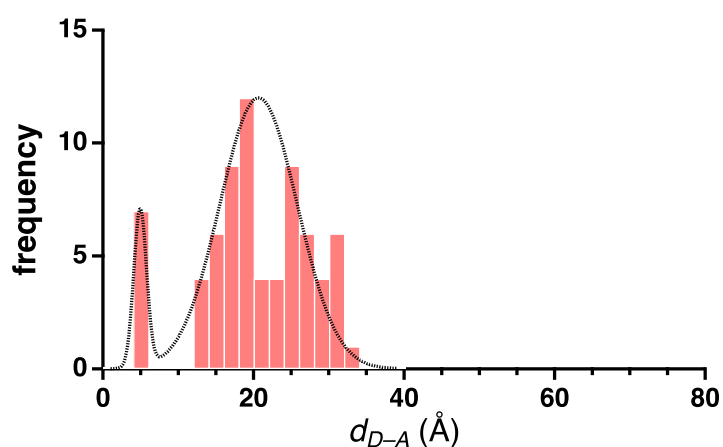

Figure S37. Distribution of the distances between the center of the  $N_4$  porphyrin ring and the center of the naphthoquinonato pillars in the **P-Pyr<sub>4</sub>@(Rucage)<sub>4</sub>** system, calculated from the molecular modeling (Table S5); the black dotted line is the gaussian interpolation of the distribution.

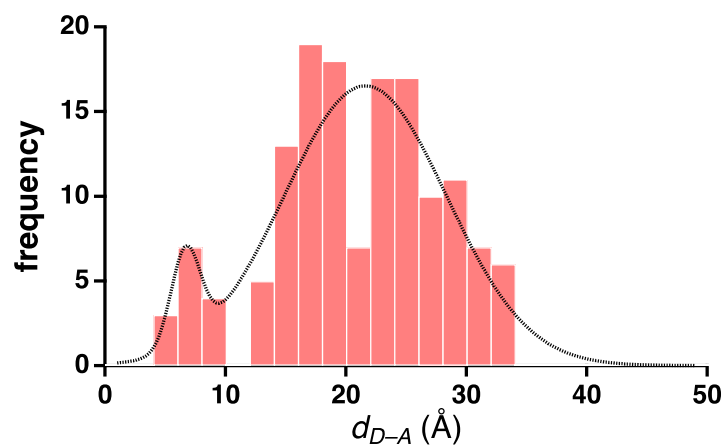

Figure S38. Distribution of the distances between the center of the N<sub>4</sub> porphyrin ring and the ruthenium atoms in the **P-Pyr<sub>4</sub>@(Ru<sub>2</sub>Qz)<sub>4</sub>** system, calculated from the molecular modeling (Table S6); the black dotted line is the gaussian interpolation of the distribution.
